# Supplementary material for: Formate modulated solvothermal synthesis of ZIF-8 investigated using time-resolved in situ X-ray diffraction and scanning electron microscopy
Source: Royal Society of Chemistry journal article supplement (doi:10.1039/c1ce06002c), 2011-10-27
Supplement: c1ce06002c.pdf [file c1ce06002c.pdf]

Electronic Supplementary Information

**Formate modulated solvothermal synthesis of  
ZIF-8 investigated using time-resolved *in situ*  
X-ray diffraction and scanning electron  
microscopy**

*Janosch Cravillon,\*<sup>a</sup> Christian A. Schröder,<sup>a</sup> Helge Bux,<sup>b</sup> André Rothkirch,<sup>c</sup> Jürgen Caro<sup>b</sup> and  
Michael Wiebcke\*<sup>a</sup>*

<sup>a</sup>Institut für Anorganische Chemie, Leibniz Universität Hannover, Callinstr. 9, 30167 Hannover  
Germany; <sup>b</sup>Institut für Physikalische Chemie und Elektrochemie, Leibniz Universität Hannover,  
Callinstr. 3A, 30167 Hannover, Germany; <sup>c</sup>Deutsches Elektronen-Synchrotron (DESY), Notkestr.  
85, 22607 Hamburg, Germany.

## Powder XRD

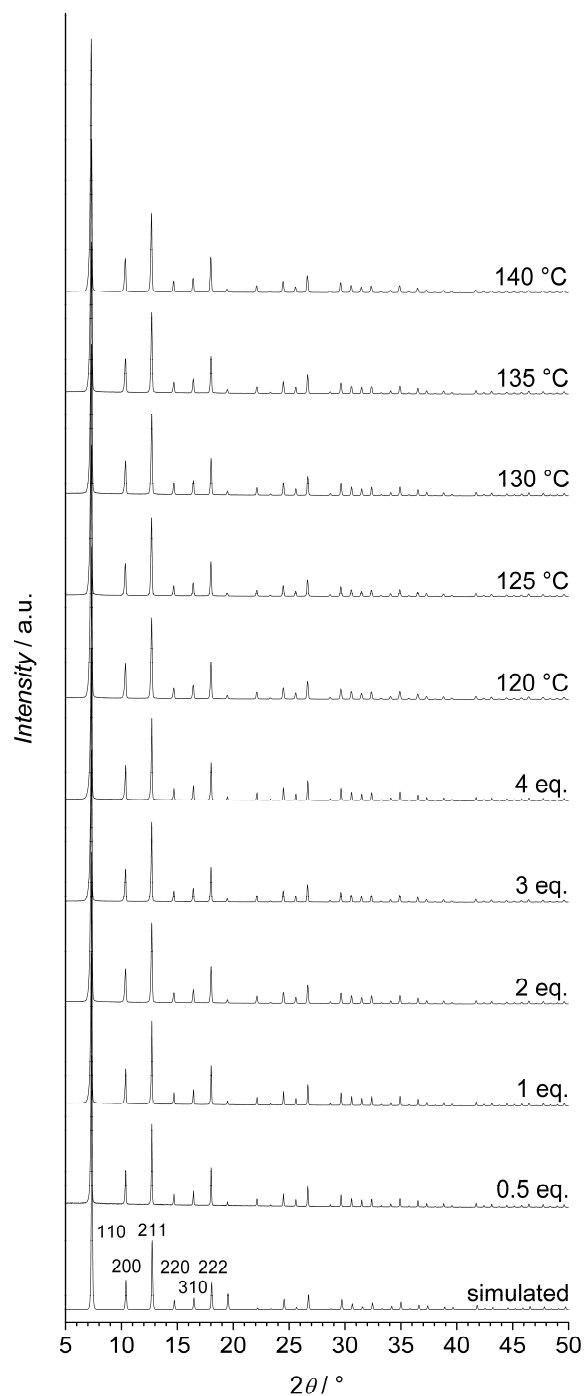

**Fig. S1** Powder XRD patterns taken from the final products obtained by the monitored syntheses for the composition Zn/Hmim/NaHCO<sub>2</sub>/MeOH = 1 : 2 : 2 : 333 at different temperatures and for the varied compositions Zn/Hmim/NaHCO<sub>2</sub>/MeOH = 1 : 2 : *x* : 333 (0.5 ≤ *x* ≤ 4.0) at *T* = 130 °C. A pattern simulated from crystal structure data is also shown.

## Sharp-Hancock Plots

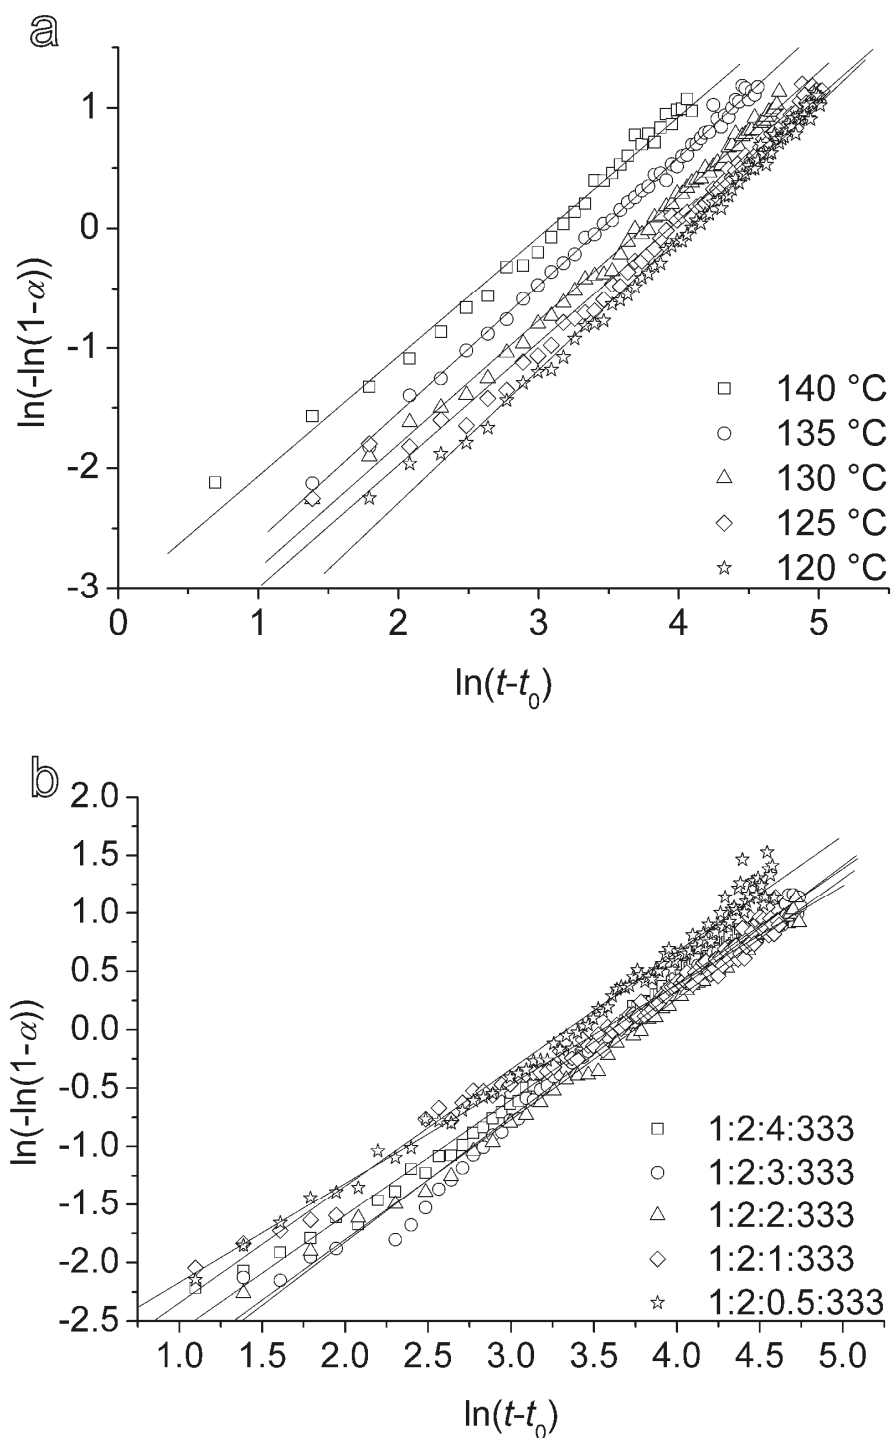

**Fig. S2** Sharp-Hancock plots (a) for the composition Zn/Hmim/NaHCO<sub>2</sub>/MeOH = 1 : 2 : 2 : 333 at different temperatures and (b) for the varied compositions Zn/Hmim/NaHCO<sub>2</sub>/MeOH = 1 : 2 : x : 333 ( $0.5 \leq x \leq 4.0$ ) at  $T = 130$  °C.

## Non-linear Avrami Erofe'ev Fits

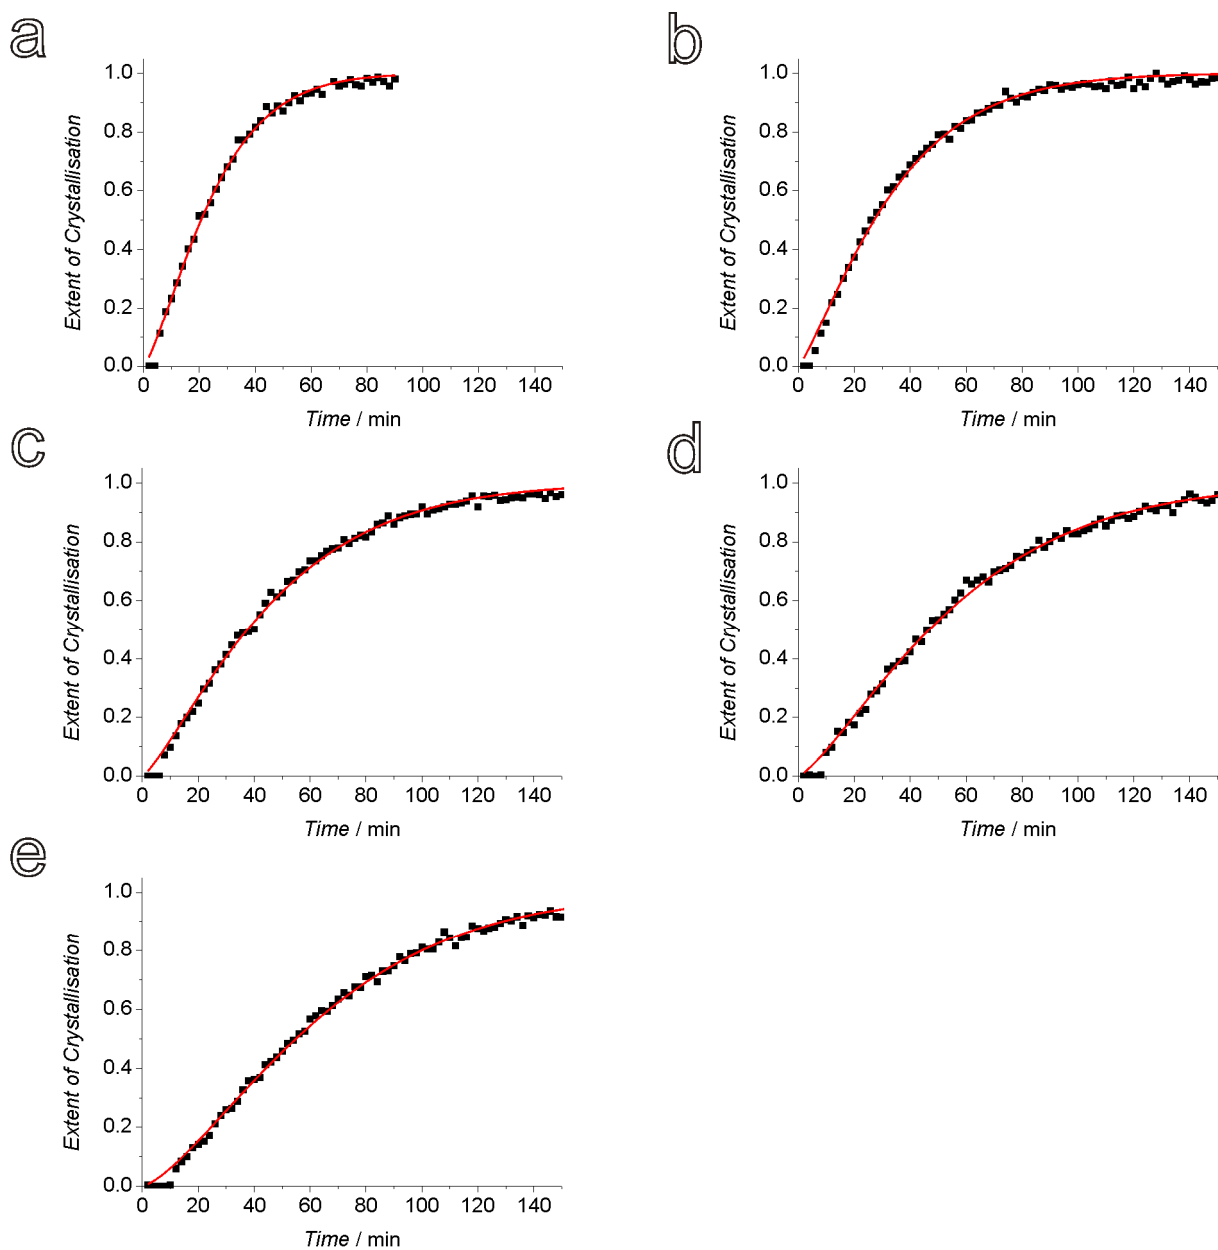

**Fig. S3** Extent of crystallisation vs. time (black squares) for the composition Zn/Hmim/NaHCO<sub>2</sub>/MeOH = 1 : 2 : 2 : 333 at different temperatures [(a) 140 °C, (b) 135 °C, (c) 130 °C, (d) 125 °C and (e) 120 °C] and corresponding non-linear least-squares fits with the Avrami-Erofe'ev equation (red line).

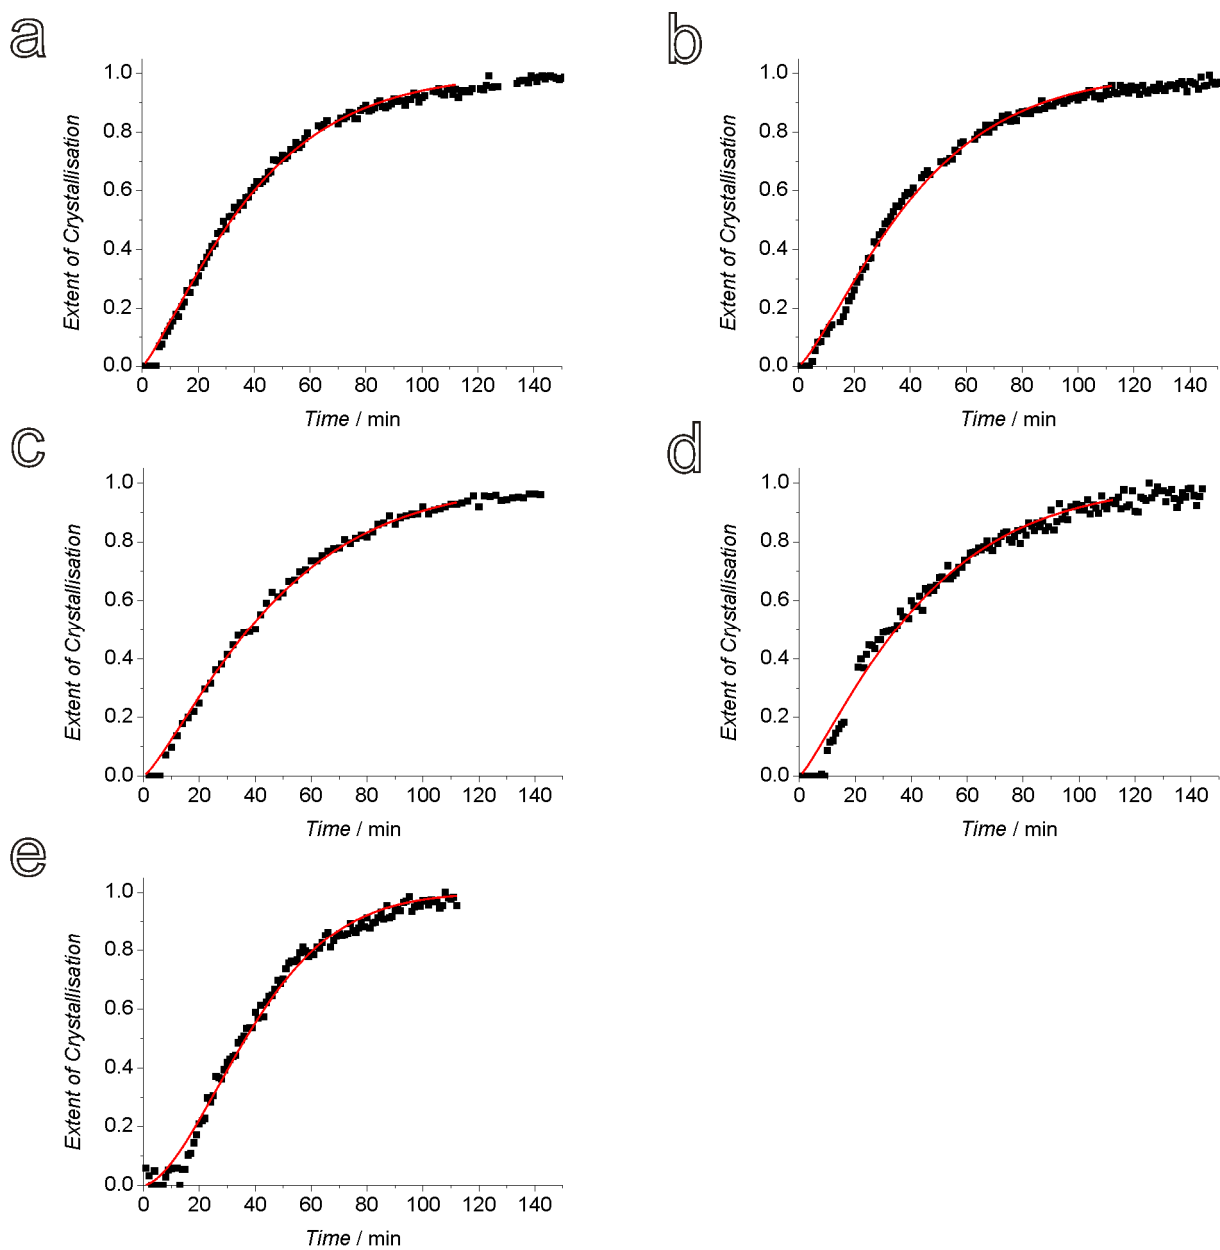

**Fig. S4** Extent of crystallisation vs. time (black squares) for the varied compositions Zn/Hmim/NaHCO<sub>2</sub>/MeOH = 1 : 2 : x : 333 [(a)  $x = 4.0$ , (b)  $x = 3.0$ , (c)  $x = 2.0$ , (d)  $x = 1.0$  and (e)  $x = 0.5$ ] and corresponding non-linear least-squares fits with the Avrami-Erofe'ev equation (red line).

## Arrhenius Plots

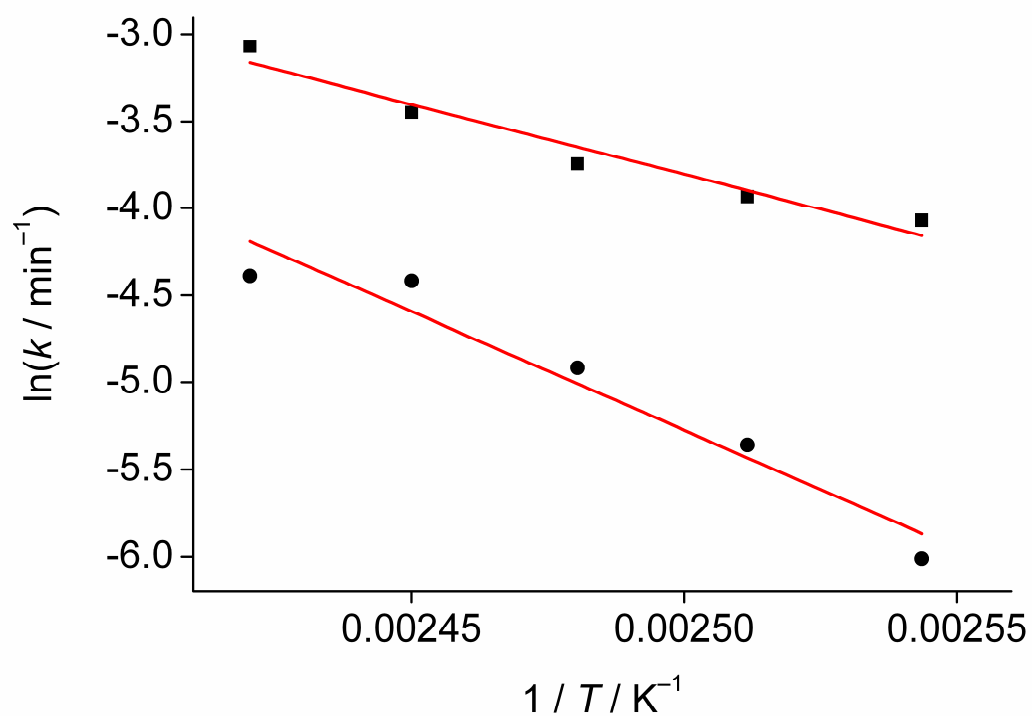

**Fig. S5** Arrhenius plots for the temperature-dependent rate constants of the Sharp-Hancock analysis (black squares) and non-linear least-squares fitting with the Avrami-Erofe'ev equation (black circles).

## Non-linear Gualtieri Fits

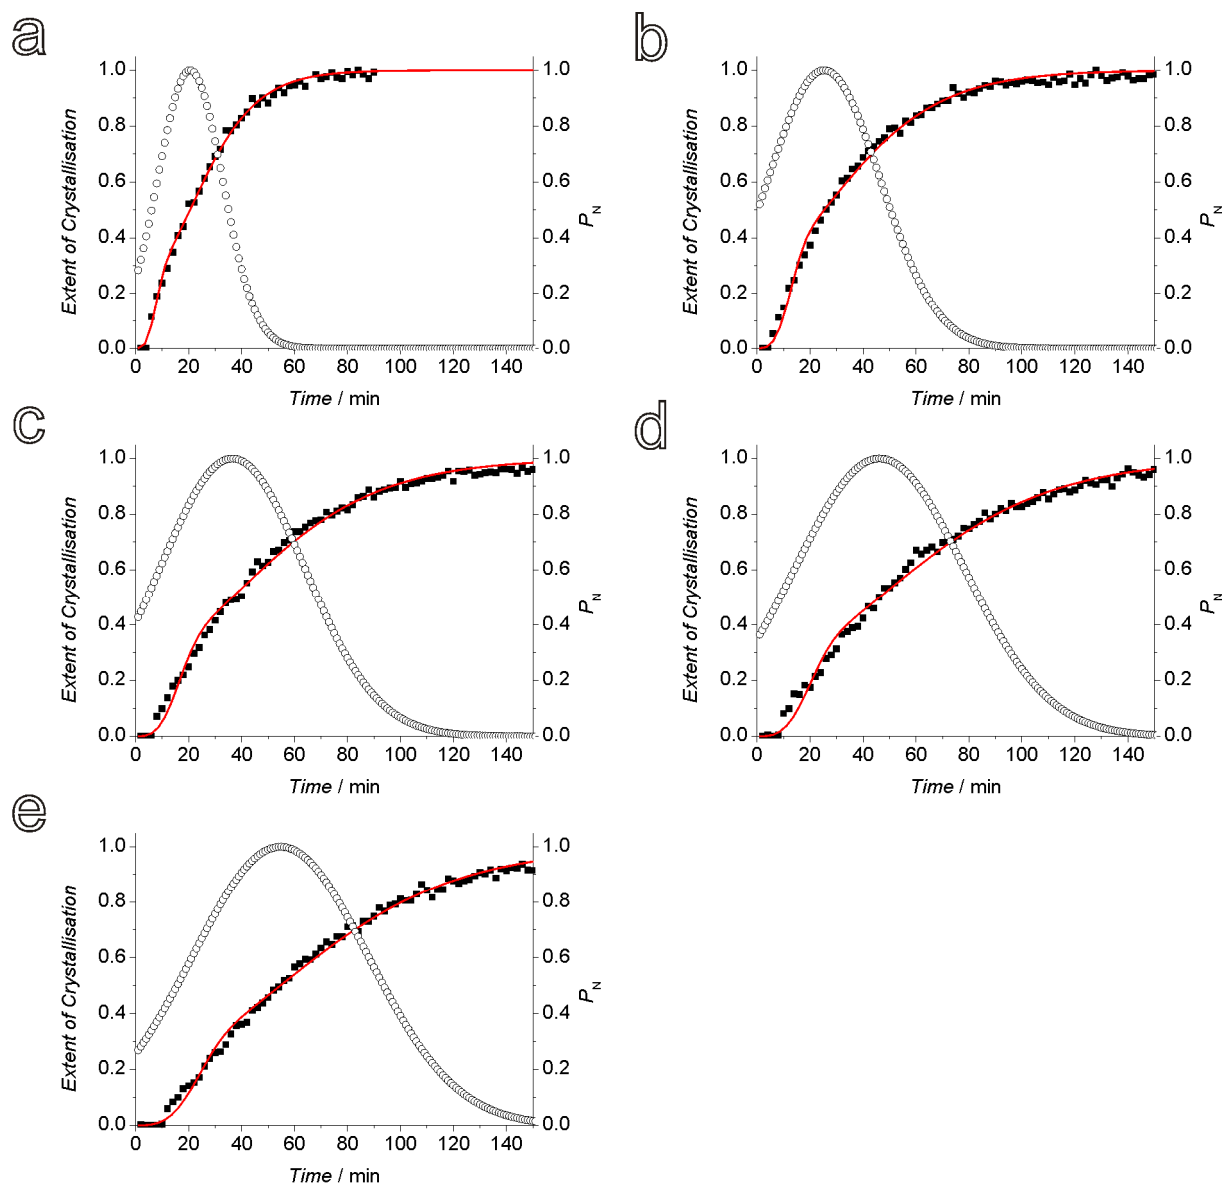

**Fig. S6** Extent of crystallisation vs. time (black squares) for the composition Zn/Hmim/NaHCO<sub>2</sub>/MeOH = 1 : 2 : 2 : 333 at different temperatures [(a) 140 °C, (b) 135 °C, (c) 130 °C, (d) 125 °C and (e) 120 °C] and corresponding non-linear least-squares fits with the Gualtieri equation (red line) as well as probability curves of nucleation  $P_N$  (open circles).

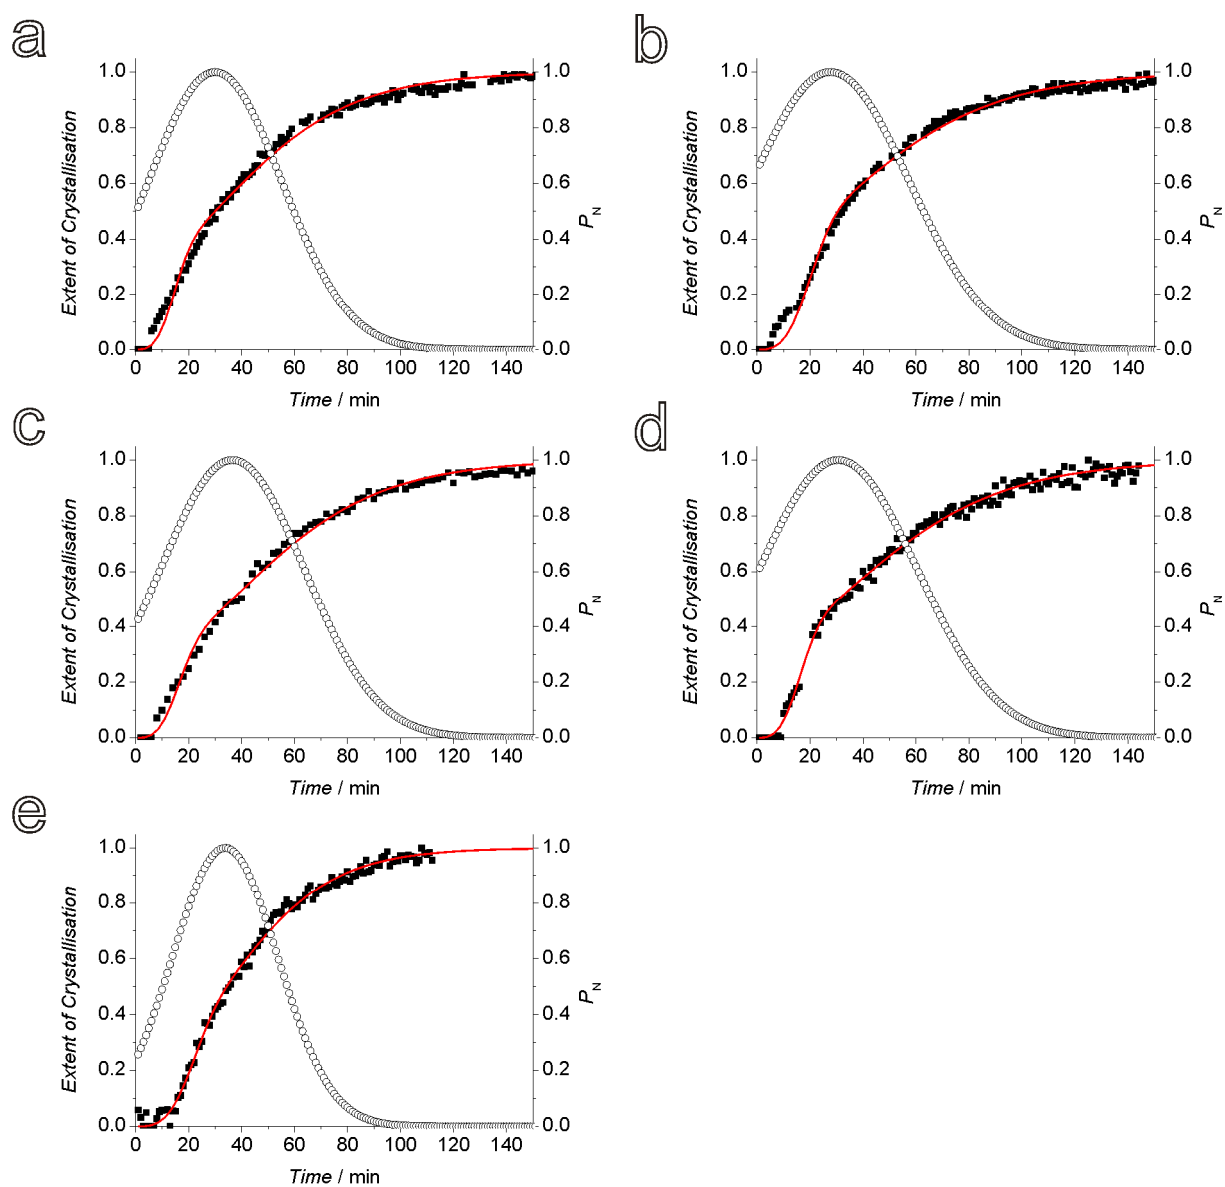

**Fig. S7** Extent of crystallisation vs. time (black squares) for the varied compositions Zn/Hmim/NaHCO<sub>2</sub>/MeOH = 1 : 2 :  $x$  : 333 [(a)  $x = 4.0$ , (b)  $x = 3.0$ , (c)  $x = 2.0$ , (d)  $x = 1.0$  and (e)  $x = 0.5$ ] and corresponding non-linear least-squares fits with the Gualtieri equation (red line) as well as probability curves of nucleation  $P_N$  (open circles).



## Final Maximum Crystal Size

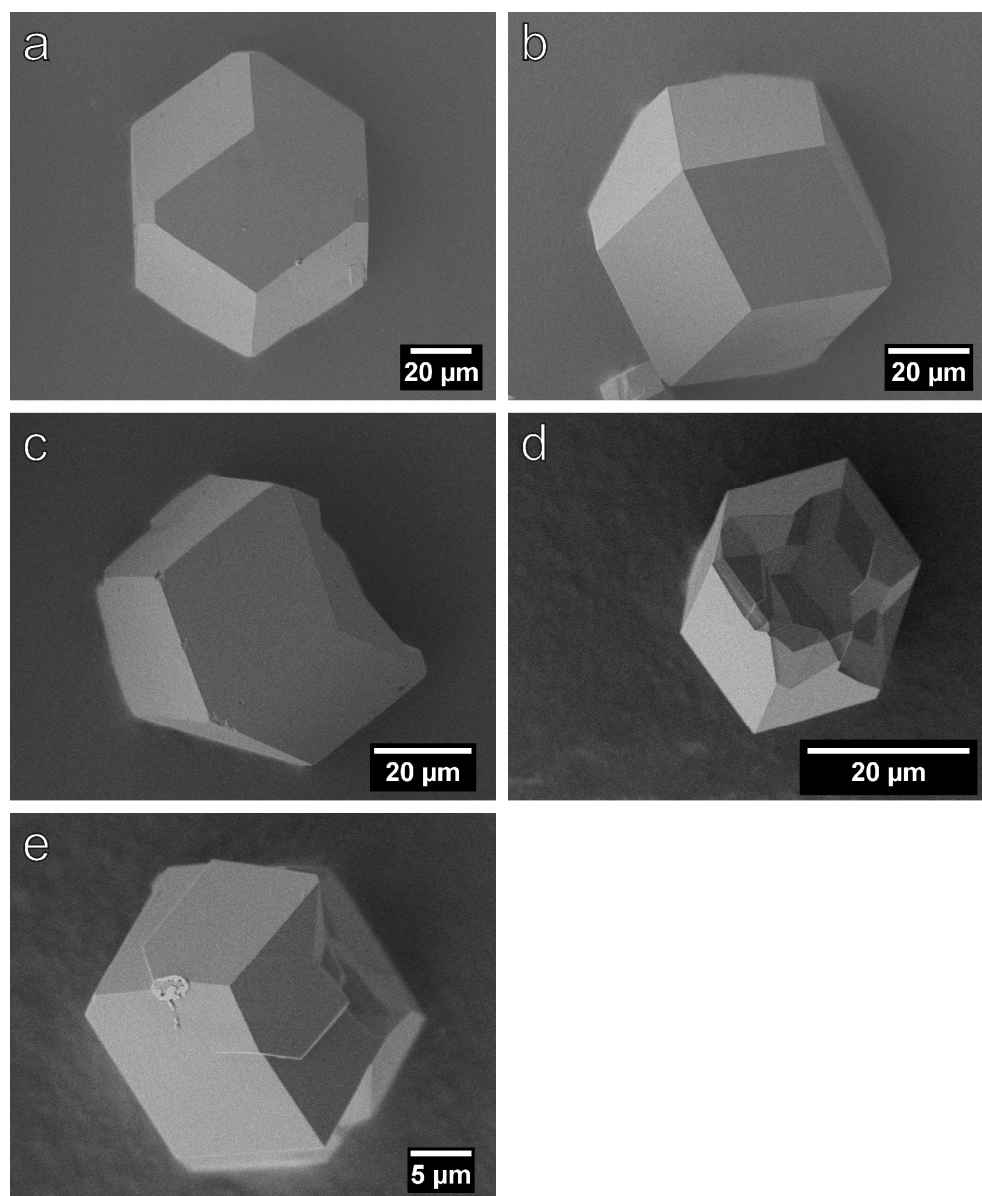

**Fig. S8** SEM micrographs showing typical crystals of maximum size as obtained by the monitored syntheses for the compositions Zn/Hmim/NaHCO<sub>2</sub>/MeOH = 1 : 2 :  $x$  : 333 [(a)  $x$  = 0.5, (b)  $x$  = 1.0, (c)  $x$  = 2.0, (d)  $x$  = 3.0 and (e)  $x$  = 4.0].

**Table S1** Final maximum crystal sizes.

| $x$                          | 0.5 | 1.0 | 2.0 | 3.0 | 4.0 |
|------------------------------|-----|-----|-----|-----|-----|
| Crystal Size / $\mu\text{m}$ | 71  | 59  | 51  | 25  | 23  |

## SEM Micrograph from Stirred Synthesis Solution

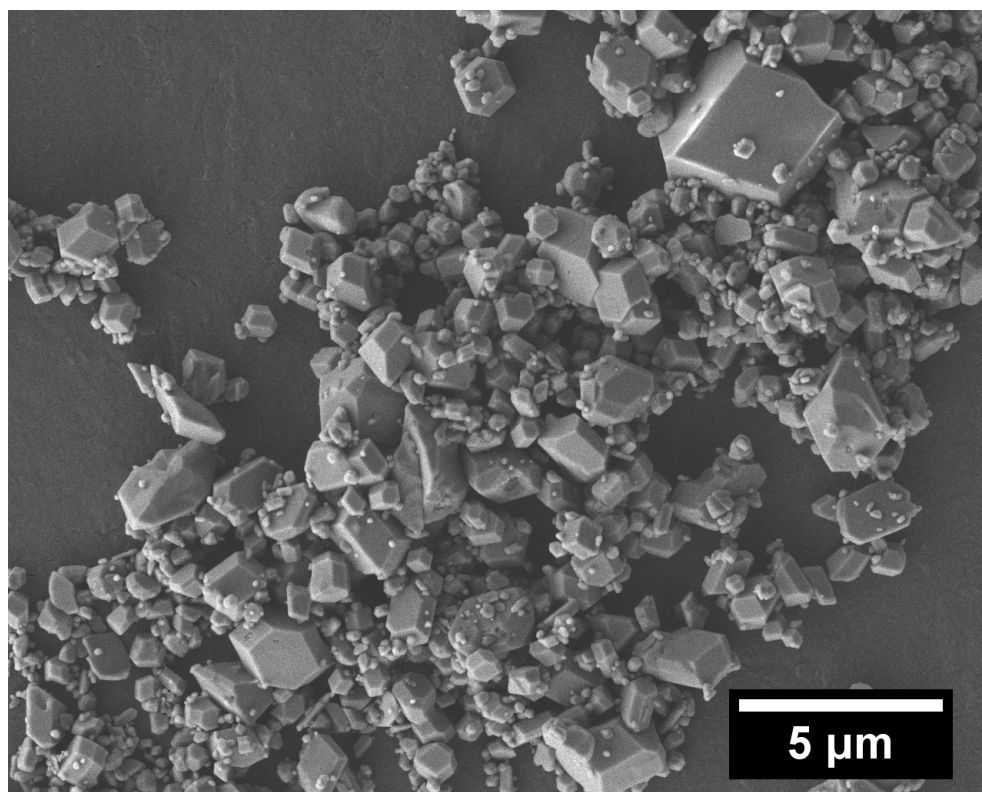

**Fig. S9** SEM micrograph taken from solid material obtained from a stirred synthesis solution.

## TG/DTA Analysis

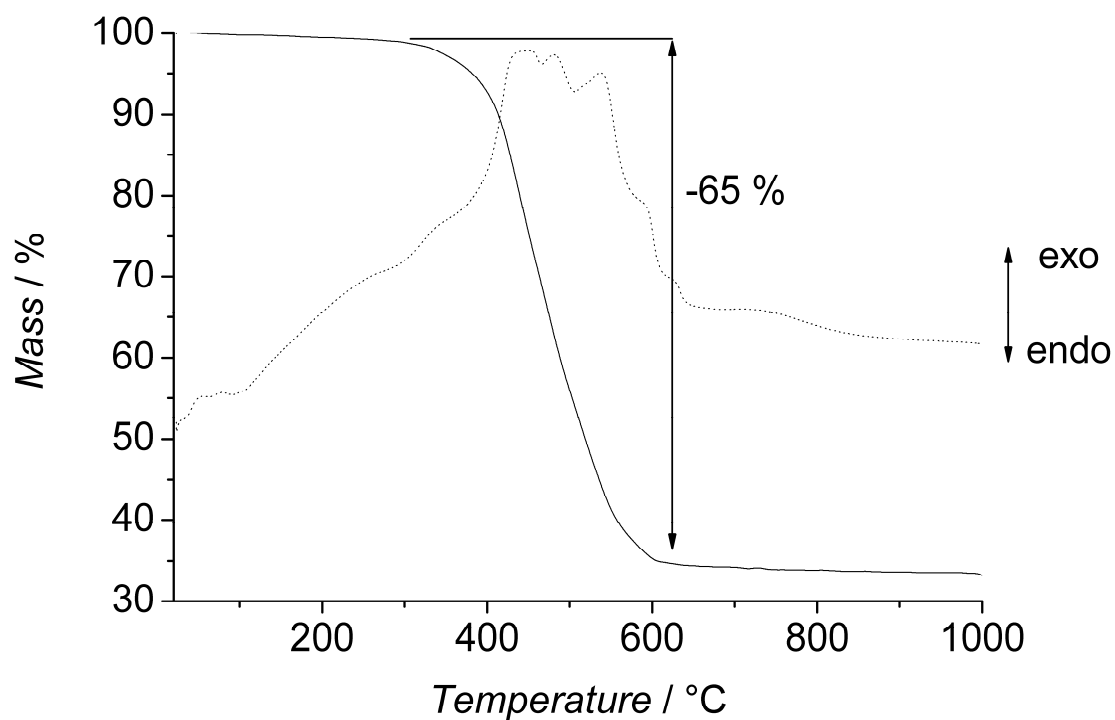

**Figure S10** TG (solid line) and DTA curves (dotted line) measured from a sample obtained by the optimised synthesis. Ramp: 5 K / min, flowing air (Netzsch Thermal Analyser STA 429). The total mass loss (65 %) agrees well with the calculated ones (64 %) assuming decomposition of ZIF-8 [Zn(mim)<sub>2</sub>] into solid hexagonal ZnO (as verified by XRD) and volatile species stemming from the organic ligand.

## Nitrogen Sorption Isotherms

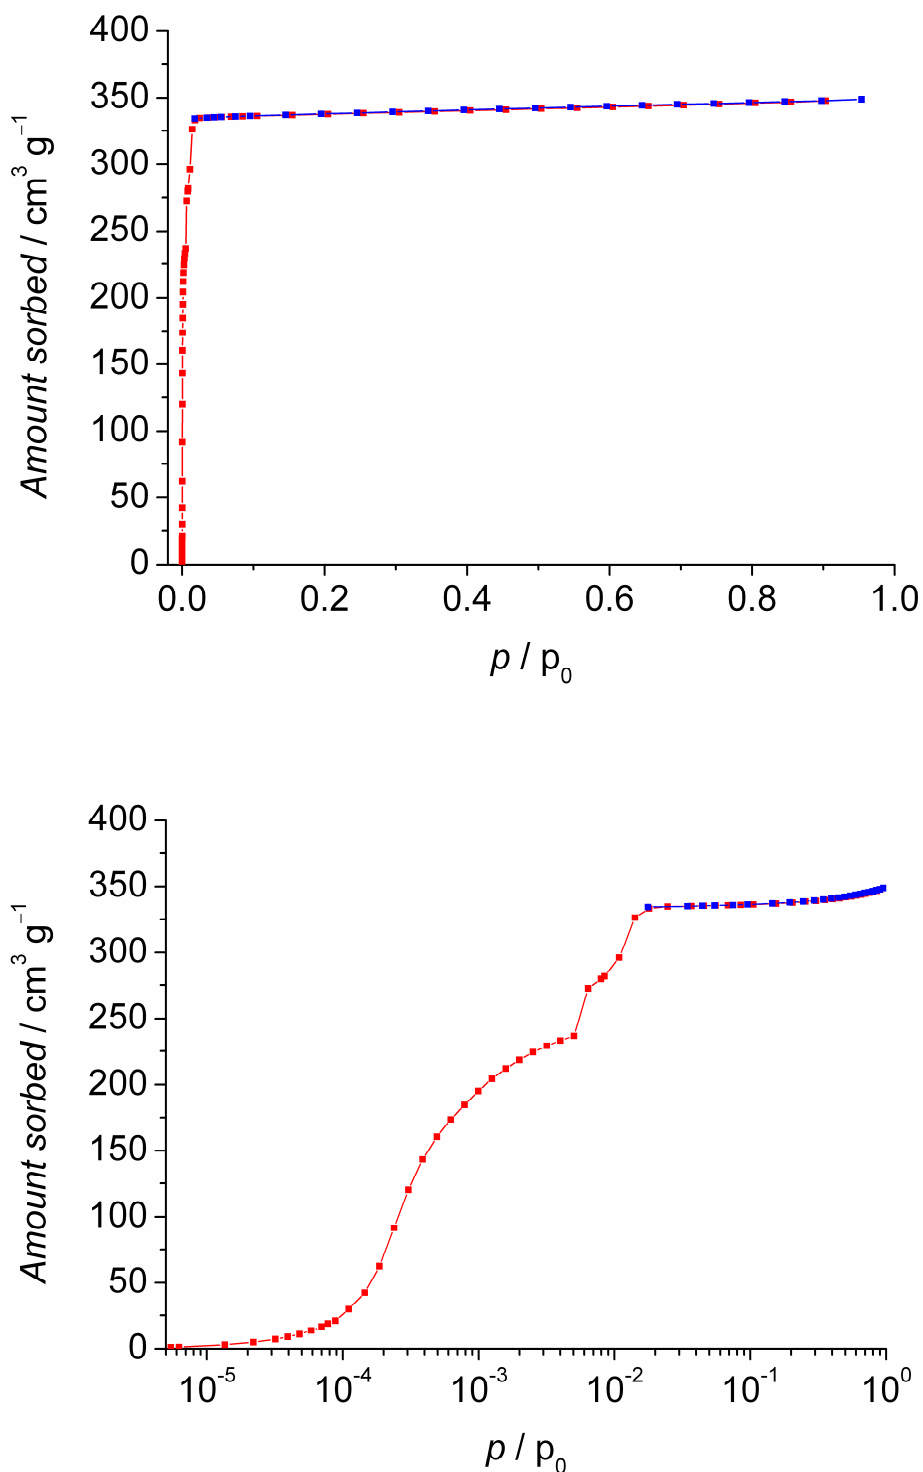

**Figure S11** Nitrogen sorption isotherms at 77 K as linear-linear (top) and linear-log plots (bottom). Red and blue data correspond to the adsorption and desorption branches, respectively (Quantachrome Autosorb 1-MP).

The apparent specific surface area was determined by the Brunauer-Emmett-Teller (BET) method:  $S_{\text{BET}} = 1450 \text{ m}^2/\text{g}$ .
